# Supplementary material for: Genome atlas analysis based profiling of Akt pathway genes in the early and advanced human prostate cancer
Source: PubMed Central journal article supplement (PMC6650170; doi:10.18632/oncoscience.482), 2019-07-02
Supplement: oncoscience-06-317-s001.pdf [file oncoscience-06-317-s001.pdf]

## SUPPLEMENTARY MATERIALS

**Supplementary Table 1.** Data on clinical trials on Akt inhibitor MK-2206 for various cancers collected from www.clinicaltrials.gov

| Clinical trial ID | Cancer type                                                                                       | Size | Treatment groups                                                                                         | Results                                                                 | Compared to First line /Standard therapy                      |
|-------------------|---------------------------------------------------------------------------------------------------|------|----------------------------------------------------------------------------------------------------------|-------------------------------------------------------------------------|---------------------------------------------------------------|
| NCT01283035       | Recurrent and platinum-resistant ovarian, fallopian tube, or primary peritoneal cancer            | 5    | Single group; MK-2206 monotherapy PO QW for 4 weeks (one cycle); repeat if patient is benefiting         | Not available                                                           |                                                               |
| NCT01283035       | Recurrent and platinum-resistant ovarian, fallopian tube, or primary peritoneal cancer            | 5    | Single group; MK-2206 monotherapy PO QW for 4 weeks (one cycle); repeat if patient is benefiting         | Not available                                                           |                                                               |
| NCT01349933       | Recurrent or metastatic head and neck cancer                                                      | 21   | Single group; MK-2206 monotherapy 200 mg PO QW for 4 weeks (one cycle); repeat if patient is benefiting  | OS:10 months (95% CI; 5.9 - 20); PFS: 3.5 months (95% CI; 0.9 - 7.3)    | Cisplatin + Gemcitabine; OS: 29.1 months; PFS: 7.0 months [1] |
| NCT01253447       | Relapsed or refractory acute myeloid leukemia (AML)                                               | 19   | Single group; MK-2206 monotherapy 200 mg PO QW for 4 weeks (one cycle); repeat if patient is benefiting  | Study was terminated due to insufficient drug efficacy                  |                                                               |
| NCT01802320       | Previously treated, metastatic or locally advanced colon or rectal cancer                         | 18   | Single group; MK-2206 monotherapy PO QW for 4 weeks (one cycle); repeat if patient is benefiting         | Not available                                                           |                                                               |
| NCT01186705       | Metastatic KRAS-Wild-Type, PIK3CA-Mutated, Colorectal Cancer                                      | 1    | Single group; MK-2206 monotherapy 200 mg PO QW for 4 weeks (one cycle); repeat if patient is benefiting  | Not available                                                           |                                                               |
| NCT01277757       | Advanced breast cancer with a PIK3CA mutation, or an AKT mutation and/or PTEN loss/ PTEN mutation | 28   | Single group; MK-2206 monotherapy 200 mg PO QW for 4 weeks (one cycle); repeat if patient is benefiting  | Not available                                                           |                                                               |
| NCT01260701       | Advanced Gastric/ Gastro-esophageal Junction Cancer                                               | 70   | Single group; MK-2206 monotherapy 60 mg PO QOD on days 1-28 (one cycle); repeat if patient is benefiting | OS: 5.1 months (95% CI; 3.7 - 9.4); PFS: 1.8 months (95% CI; 1.7 - 1.8) | Cisplatin + 5-FU; OS: 33 weeks; PFS: 27 week [2]              |

| Clinical trial ID | Cancer type                                                                                               | Size                                     | Treatment groups                                                                                                                                           | Results                                                                                                                                                                                   | Compared to First line /Standard therapy                                                                                                                    |
|-------------------|-----------------------------------------------------------------------------------------------------------|------------------------------------------|------------------------------------------------------------------------------------------------------------------------------------------------------------|-------------------------------------------------------------------------------------------------------------------------------------------------------------------------------------------|-------------------------------------------------------------------------------------------------------------------------------------------------------------|
| NCT01169649       | Metastatic Neuroendocrine Tumors (NET)                                                                    | 8                                        | Single group; MK-2206 monotherapy 200 mg PO QW for 4 weeks (one cycle); repeat if patient is benefiting                                                    | Not available                                                                                                                                                                             |                                                                                                                                                             |
| NCT01294306       | Advanced non-small cell lung cancer progressed after previous response to Erlotinib Hydrochloride therapy | 80 (45 EGFR-Mutation and 34 EGFR-WT)     | Single group; MK-2206 monotherapy PO QOD on days 1-28; repeat if patient is benefiting                                                                     | OS: EGFR-Mutated: 10.6 months (95% CI; 8.6 - 23.2); EGFR WT: 11.1 months (95% CI; 7.3 - 22.1); PFS: EGFR-Mutated: 4.4 months (95% CI; 2.7 - 6.6); EGFR WT: 4.6 months (95% CI; 2.9 - 8.5) | Cisplatin + Gemcitabine or Cisplatin + Docetaxel; OS: 19.5 months; PFS: 5.2 months [3]                                                                      |
| NCT01519427       | Stage III/IV melanoma that failed prior therapy with Vemurafenib or Dabrafenib                            | 2                                        | Single group; MK-2206 monotherapy PO QW for 4 weeks + selumetinib PO BID on days 1-21 (one cycle); repeat if patient is benefiting                         | OS: 153 days, range (117 to 189); PFS: 105 days, range (42 to 168)                                                                                                                        | Vemurafenib compared to Decarbazine; OS: 13.6 months; PFS: 6.9 months [4]; Dabrafenib compared to Decarbazine: OS: favoring Dabrafenib; PFS: 5.1 months [5] |
| NCT01658943       | Previously treated metastatic pancreatic cancer                                                           | 121 (62 mFOLFOX and 58 MK + Selumetinib) | Two groups:<br>1st group: mFOLFOX regimen PO QD on days 1-28;<br>2nd group: MK2206 + selumetinib, MK2206 (135 mg) PO QW and selumetinib PO QD on days 1-28 | 1st group: OS: 6.7 months (95% CI; 6 - 8.3); FBS: 2 months (95% CI; 1.8 - 2.9);<br>2nd group: OS: 3.9 months (95% CI; 3.5 - 4.6); FBS: 1.9 months (95% CI; 1.8 - 2.1)                     |                                                                                                                                                             |
| NCT01239355       | Previously treated advanced liver cancer                                                                  | 15                                       | Single group; MK-2206 monotherapy 200 mg PO QW for 4 weeks (one cycle); repeat if patient is benefiting                                                    | OS: 6.1 months (95% CI; 3.0 - 8.4); PFS: 1.7 months (95% CI; 1.6 - 3.0)                                                                                                                   | Sorafenib; OS: 10.7 months; PFS: 4.1 months [6]                                                                                                             |

| Clinical trial ID | Cancer type                                                  | Size                                  | Treatment groups                                                                                        | Results                                                                                                                       | Compared to First line /Standard therapy                                                                                                                                                                                                                                                                                                             |
|-------------------|--------------------------------------------------------------|---------------------------------------|---------------------------------------------------------------------------------------------------------|-------------------------------------------------------------------------------------------------------------------------------|------------------------------------------------------------------------------------------------------------------------------------------------------------------------------------------------------------------------------------------------------------------------------------------------------------------------------------------------------|
| NCT01466868       | Relapsed or refractory diffuse large B Cell Lymphoma (AKTIL) | 22                                    | Single group; MK-2206 monotherapy 200 mg PO QW for 4 weeks (one cycle); repeat if patient is benefiting | Not available                                                                                                                 |                                                                                                                                                                                                                                                                                                                                                      |
| NCT01481129       | Relapsed or refractory diffuse large B Cell Lymphoma (AKTIL) | 22                                    | Single group; MK-2206 monotherapy PO QW for 4 weeks (one cycle); repeat if patient is benefiting        | OS: 9.6 months (95% CI; 2.8 to 18.8); PFS: 1.71 months (95% CI; 0.8 to 1.8)                                                   | Gemcitabine + Dexamethasone + Cisplatin; OS: 8.9 months; FBS: 3.1 months [7]                                                                                                                                                                                                                                                                         |
| NCT01307631       | Recurrent or advanced endometrial cancer                     | 37 (9 PIK3CA Mutant and 28 PIK3CA WT) | Two groups; All with MK-2206 monotherapy PO QW for 4 weeks (one cycle); repeat if patient is benefiting | OS: 8 months; range (0-12 months)<br>PFS: PIK3CA Mutant: 1.6 months (90% CI; 0 - 1.6); PIK3CA WT: 1.8 months (90%CI; 0 - 1.8) | Carboplatin + Paclitaxel; OS: 37 months; PFS: 13 months (Miller DS, Filiaci G, Mannel R, et al. Randomized Phase III Noninferiority Trial of First Line Chemotherapy for Metastatic or Recurrent Endometrial Carcinoma: A Gynecologic Oncology Group Study. LBA2. Presented at the 2012 Society of Gynecologic Oncology Annual Meeting, Austin, TX.) |
| NCT01481129       | Relapsed or refractory diffuse large B Cell Lymphoma (AKTIL) | 22                                    | Single group; MK-2206 monotherapy PO QW for 4 weeks (one cycle); repeat if patient is benefiting        | OS: 9.6 months (95% CI; 2.8 to 18.8); PFS: 1.71 months (95% CI; 0.8 to 1.8)                                                   | Gemcitabine + Dexamethasone + Cisplatin; OS: 8.9 months; FBS: 3.1 months [7]                                                                                                                                                                                                                                                                         |
| NCT01258998       | Relapsed or refractory lymphoma                              | 59                                    | Single group; MK-2206 monotherapy 200 mg PO QW for 4 weeks (one cycle); repeat if patient is benefiting | OS: Not available<br>PFS: 2.8 months                                                                                          | Gemcitabine + Dexamethasone + Cisplatin; OS: 8.9 months; FBS: 3.1 months [7]. (Cancer. 2004 Oct 15;101(8):1835-42)                                                                                                                                                                                                                                   |

| Clinical trial ID | Cancer type                                                          | Size                                                                                                            | Treatment groups                                                                                                                                                                                                                                                                                                    | Results                                                                                                                                                                                                                     | Compared to First line /Standard therapy                                                                                                               |
|-------------------|----------------------------------------------------------------------|-----------------------------------------------------------------------------------------------------------------|---------------------------------------------------------------------------------------------------------------------------------------------------------------------------------------------------------------------------------------------------------------------------------------------------------------------|-----------------------------------------------------------------------------------------------------------------------------------------------------------------------------------------------------------------------------|--------------------------------------------------------------------------------------------------------------------------------------------------------|
| NCT01604772       | Progressive, recurrent, or metastatic adenoid cyst carcinoma         | 14                                                                                                              | Single group; MK-2206 monotherapy 150 mg PO QW for 4 weeks (one cycle); repeat if patient is benefiting                                                                                                                                                                                                             | OS: Not available; PFS: 9.2 months (95% CI; 3.8-11)                                                                                                                                                                         | No optimal treatment due to inadequate clinical trials. (Uptodate.com; Malignant salivary gland tumors: Treatment of recurrent and metastatic disease) |
| NCT01333475       | Advanced colorectal carcinoma                                        | 21 (12 in the 1st group (TAC1) and 9 in the 2nd group (TAC1A))                                                  | Two groups:<br>1st group (TAC1) : MK-2206 + AZD6244, MK-2206 90 mg PO QW and AZD6244 Hydrogen sulfate 75 mg PO QD (one cycle); repeat if patient is benefiting<br>2nd group (TAC1A): MK-2206 + AZD6244, MK-2206 135 mg PO QW and AZD6244 Hydrogen sulfate 100 mg PO QD (one cycle); repeat if patient is benefiting | This biomarker-driven phase 2 study was conducted to determine the antitumor activity of dual therapy. OS and PFS are not available                                                                                         |                                                                                                                                                        |
| NCT01425879       | Advanced refractory biliary cancer that cannot be removed by surgery | 8                                                                                                               | Single group; MK-2206 monotherapy 200 mg PO QW for 4 weeks (one cycle); repeat if patient is benefiting                                                                                                                                                                                                             | OS: 3.5 months (95% CI; 2.2 - 6.7); PFS: 1.7 months (95% CI; 0.5 - 5.6)                                                                                                                                                     | Cisplatin + Gemcitabine; OS: 11.7 months; PFS: 8 months [8]                                                                                            |
| NCT01239342       | Refractory kidney cancer                                             | 43 (29 in the MK group and 14 in the Everolimus group) For PFS analysis, 1 patient was excluded from each group | Two groups:<br>1st group: MK-2206 200 mg PO QW for 4 weeks; repeat if patient is benefiting<br>2nd group: Everolimus 10 mg PO QD for 4 weeks; repeat if patient is benefiting                                                                                                                                       | MK-2206 group:<br>OS: 23.5 months (95% CI; 10.7 - 37.4)<br>PFS: 3.68 months (95% CI; 1.77 - 5.75)<br>Everolimus group:<br>OS: 15.7 months (95% CI; 6.5 - not estimable)<br>PFS: 5.98 months (95% CI; 5.08 to not estimable) |                                                                                                                                                        |

| Clinical trial ID | Cancer type                                       | Size | Treatment groups                                                                                                                                                                                                                                                                                                                                                                                                                                                                                                       | Results                                                                     | Compared to First line /Standard therapy                    |
|-------------------|---------------------------------------------------|------|------------------------------------------------------------------------------------------------------------------------------------------------------------------------------------------------------------------------------------------------------------------------------------------------------------------------------------------------------------------------------------------------------------------------------------------------------------------------------------------------------------------------|-----------------------------------------------------------------------------|-------------------------------------------------------------|
| NCT01251861       | Patients with previously treated prostate cancer  | 104  | Two groups:<br>1st group:<br>Observation on weeks 1-12, then bicalutamide PO QD on weeks 13-44. Patients with a PSA decline of $\geq 50\%$ may continue on bicalutamide until week 72 in the absence of disease progression or unacceptable toxicity.<br>2nd group:<br>MK2206 PO QW on weeks 1-44 and bicalutamide PO QD on weeks 13-44. Patients with a PSA decline of $\geq 50\%$ may continue on Akt inhibitor MK2206 and bicalutamide until week 72 in the absence of disease progression or unacceptable toxicity | Not available                                                               |                                                             |
| NCT01370070       | Recurrent and metastatic nasopharyngeal carcinoma | 21   | Single group; MK-2206 monotherapy 200 mg PO QW for 4 weeks (one cycle); repeat if patient is benefiting                                                                                                                                                                                                                                                                                                                                                                                                                | OS: 10 months (95% CI; 5.9 to 20.0)<br>PFS: 3.5 months (95% CI; 0.9 to 7.3) | Gemcitabine + Cisplatin; OS: 29.1 months; PFS: 7 months [9] |

**Abbreviations:** OS (median), overall survival; PFS (median), progression-free survival; PO, by mouth; QW, every week; QOD, every other day; QD, every day; WT, wild-type

#### References:

- [1] J.C. Lin, J.S. Jan, C.Y. Hsu, W.M. Liang, R.S. Jiang, W.Y. Wang, Phase III study of concurrent chemoradiotherapy versus radiotherapy alone for advanced nasopharyngeal carcinoma: positive effect on overall and progression-free survival, *J Clin Oncol*, 21 (2003) 631-637.
- [2] H. Bleiberg, T. Conroy, B. Paillot, A.J. Lacave, G. Blijham, J.H. Jacob, L. Bedenne, M. Namer, P. De Besi, F. Gay, L. Collette, T. Sahnoud, Randomised phase II study of cisplatin and 5-fluorouracil (5-FU) versus cisplatin alone in advanced squamous cell oesophageal cancer, *Eur J Cancer*, 33 (1997) 1216-1220.
- [3] R. Rosell, E. Carcereny, R. Gervais, A. Vergnenegre, B. Massuti, E. Felip, R. Palmero, R. Garcia-Gomez, C. Pallares, J.M. Sanchez, R. Porta, M. Cobo, P. Garrido, F. Longo, T. Moran, A. Insa, F. De Marinis, R. Corre, I. Bover, A. Illiano, E. Dansin, J. de Castro, M. Milella, N. Reguart, G. Altavilla, U. Jimenez, M. Provencio, M.A. Moreno, J. Terrasa, J. Munoz-Langa, J. Valdivia, D. Isla, M. Domine, O.

- Molinier, J. Mazieres, N. Baize, R. Garcia-Campelo, G. Robinet, D. Rodriguez-Abreu, G. Lopez-Vivanco, V. Gebbia, L. Ferrera-Delgado, P. Bombaron, R. Bernabe, A. Bearz, A. Artal, E. Cortesi, C. Rolfo, M. Sanchez-Ronco, A. Drozdowskyj, C. Queralt, I. de Aguirre, J.L. Ramirez, J.J. Sanchez, M.A. Molina, M. Taron, L. Paz-Ares, P.-C. Spanish Lung Cancer Group in collaboration with Groupe Francais de, T. Associazione Italiana Oncologia, Erlotinib versus standard chemotherapy as first-line treatment for European patients with advanced EGFR mutation-positive non-small-cell lung cancer (EURTAC): a multicentre, open-label, randomised phase 3 trial, *Lancet Oncol*, 13 (2012) 239-246.
- [4] G.A. McArthur, P.B. Chapman, C. Robert, J. Larkin, J.B. Haanen, R. Dummer, A. Ribas, D. Hogg, O. Hamid, P.A. Ascierto, C. Garbe, A. Testori, M. Maio, P. Lorigan, C. Lebbe, T. Jouary, D. Schadendorf, S.J. O'Day, J.M. Kirkwood, A.M. Eggermont, B. Dreno, J.A. Sosman, K.T. Flaherty, M. Yin, I. Caro, S. Cheng, K. Trunzer, A. Hauschild, Safety and efficacy of vemurafenib in BRAF(V600E) and BRAF(V600K) mutation-positive melanoma (BRIM-3): extended follow-up of a phase 3, randomised, open-label study, *Lancet Oncol*, 15 (2014) 323-332.
- [5] A. Hauschild, J.J. Grob, L.V. Demidov, T. Jouary, R. Gutzmer, M. Millward, P. Rutkowski, C.U. Blank, W.H. Miller, Jr., E. Kaempgen, S. Martin-Algarra, B. Karaszewska, C. Mauch, V. Chiarion-Sileni, A.M. Martin, S. Swann, P. Haney, B. Mirakhur, M.E. Guckert, V. Goodman, P.B. Chapman, Dabrafenib in BRAF-mutated metastatic melanoma: a multicentre, open-label, phase 3 randomised controlled trial, *Lancet*, 380 (2012) 358-365.
- [6] J.M. Llovet, S. Ricci, V. Mazzaferro, P. Hilgard, E. Gane, J.F. Blanc, A.C. de Oliveira, A. Santoro, J.L. Raoul, A. Forner, M. Schwartz, C. Porta, S. Zeuzem, L. Bolondi, T.F. Greten, P.R. Galle, J.F. Seitz, I. Borbath, D. Haussinger, T. Giannaris, M. Shan, M. Moscovici, D. Voliotis, J. Bruix, S.I.S. Group, Sorafenib in advanced hepatocellular carcinoma, *N Engl J Med*, 359 (2008) 378-390.
- [7] M. Crump, T. Baetz, S. Couban, A. Belch, D. Marcellus, K. Howson-Jan, K. Imrie, R. Myers, G. Adams, K. Ding, N. Paul, L. Shepherd, J. Iglesias, R. Meyer, Gemcitabine, dexamethasone, and cisplatin in patients with recurrent or refractory aggressive histology B-cell non-Hodgkin lymphoma: a Phase II study by the National Cancer Institute of Canada Clinical Trials Group (NCIC-CTG), *Cancer*, 101 (2004) 1835-1842.
- [8] J. Valle, H. Wasan, D.H. Palmer, D. Cunningham, A. Anthony, A. Maraveyas, S. Madhusudan, T. Iveson, S. Hughes, S.P. Pereira, M. Roughton, J. Bridgewater, A.B.C.T. Investigators, Cisplatin plus gemcitabine versus gemcitabine for biliary tract cancer, *N Engl J Med*, 362 (2010) 1273-1281.
- [9] L. Zhang, Y. Huang, S. Hong, Y. Yang, G. Yu, J. Jia, P. Peng, X. Wu, Q. Lin, X. Xi, J. Peng, M. Xu, D. Chen, X. Lu, R. Wang, X. Cao, X. Chen, Z. Lin, J. Xiong, Q. Lin, C. Xie, Z. Li, J. Pan, J. Li, S. Wu, Y. Lian, Q. Yang, C. Zhao, Gemcitabine plus cisplatin versus fluorouracil plus cisplatin in recurrent or metastatic nasopharyngeal carcinoma: a multicentre, randomised, open-label, phase 3 trial, *Lancet*, 388 (2016) 1883-1892.

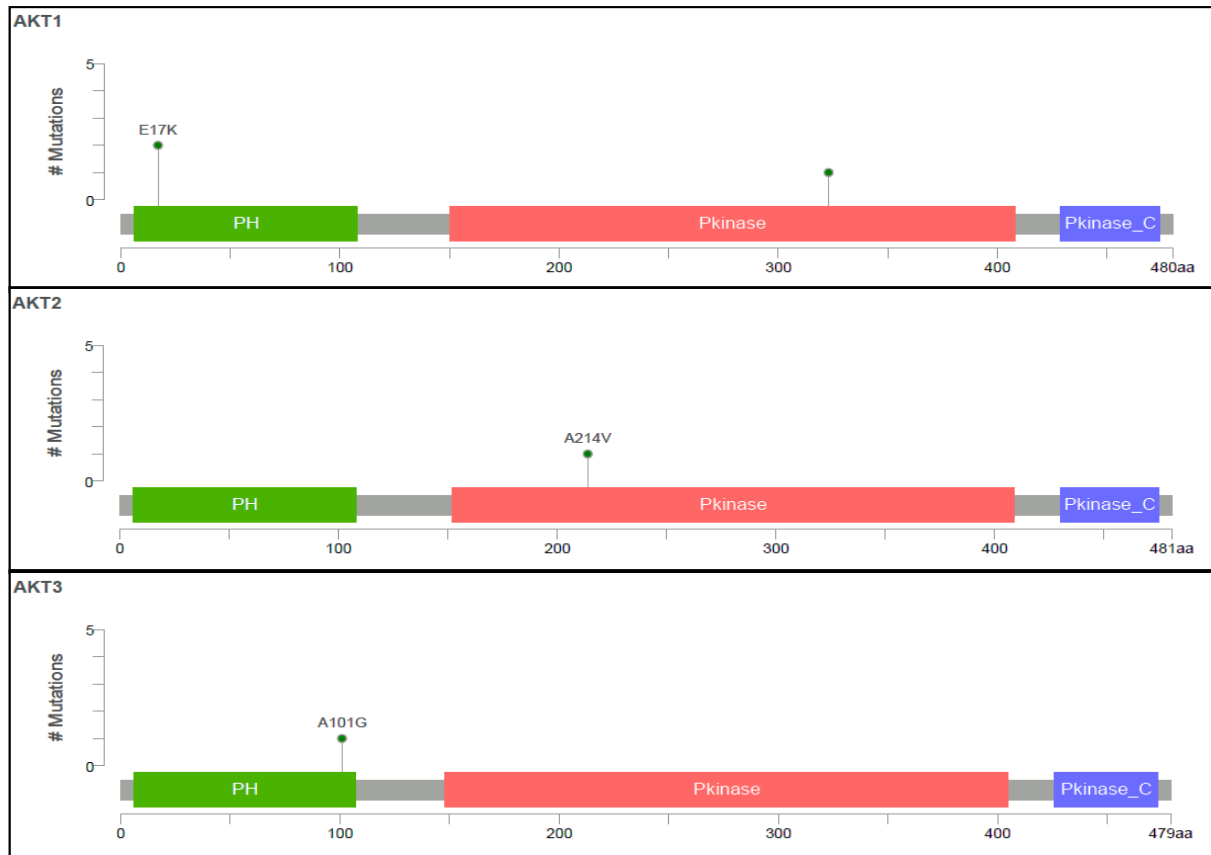

**Supplemental Figure 1: Mutation in the Akt isoforms based on the data collected from the cBioportal database.** This Figure shows the mutations detected in the Akt1, Akt2 and Akt3 isoforms in PCa patient samples based on the 6 genomic analysis studies available in the cBioportal database.

PC3 Images from Figure 8A DU145

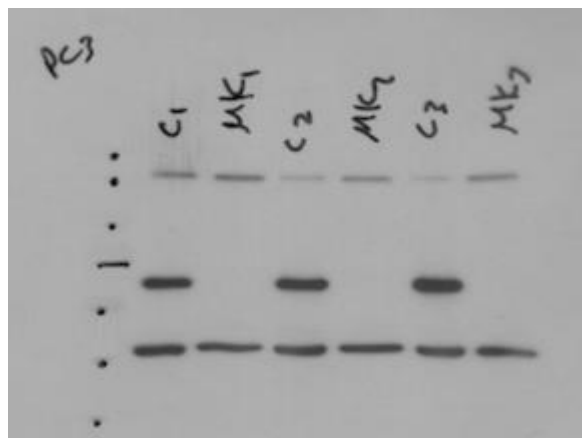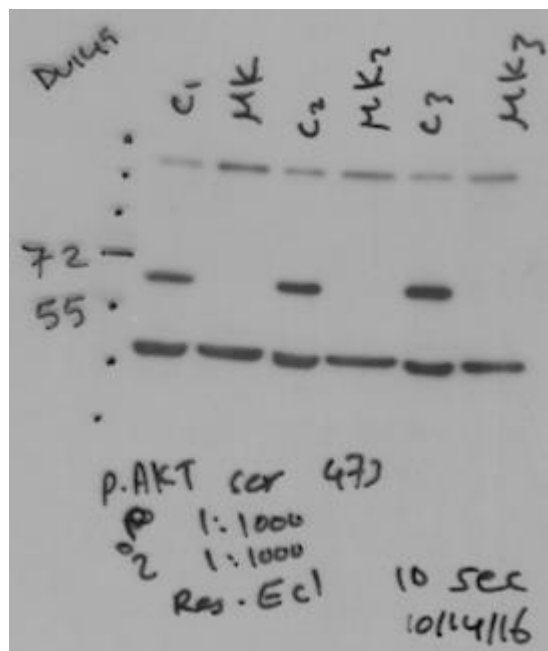

N-Cadherin  
pSer473Akt  
beta-actin

Images from Figure 8C

PC3

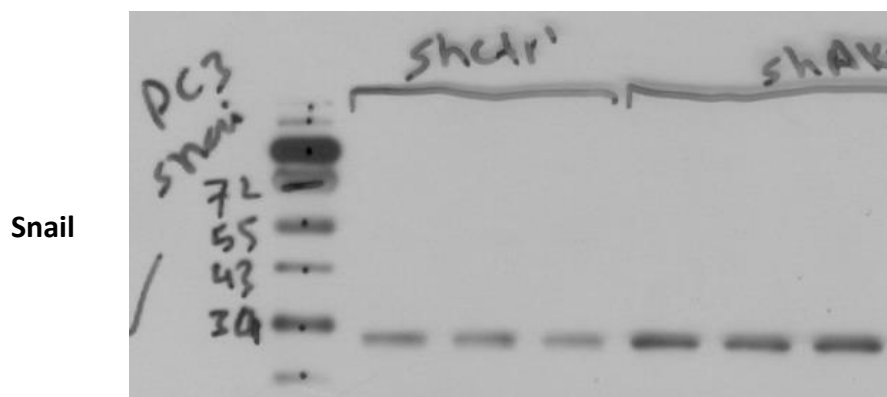

Snail

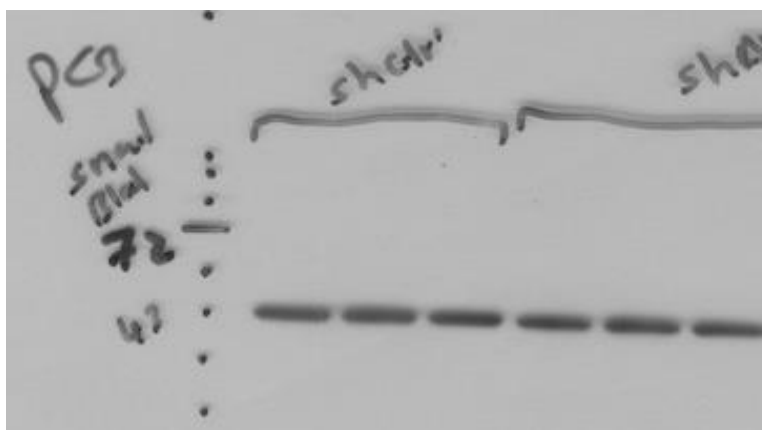

beta-actin

Supplemental Figure 2: Original Western blot images



Images from Figure 8C

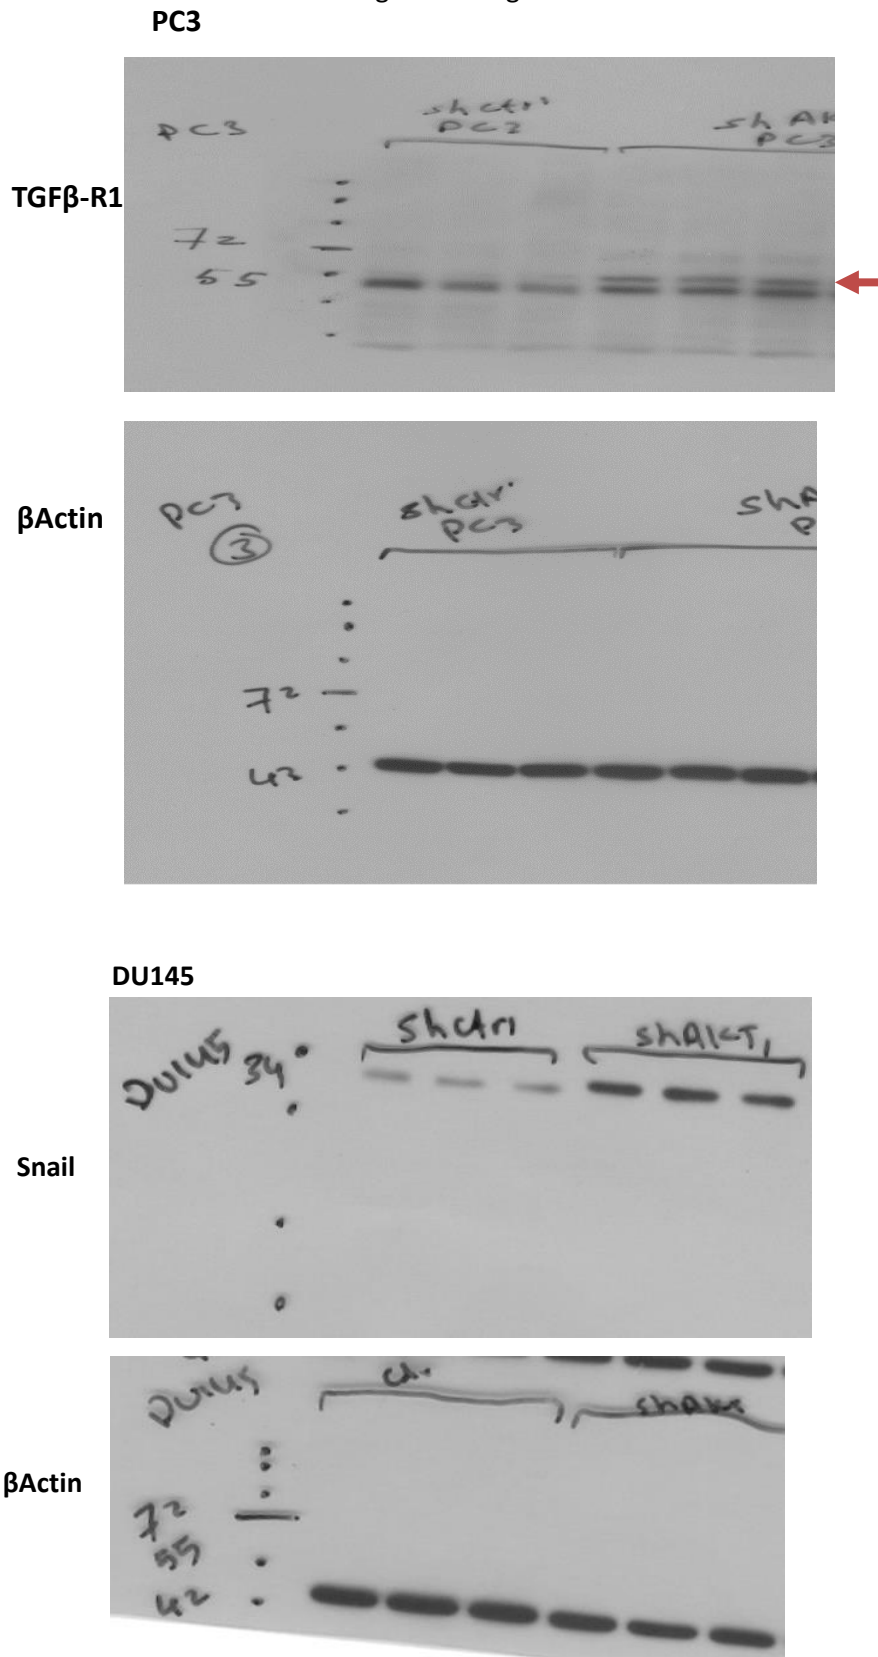

Supplemental Figure 3: Original Western blot images

Images from Figure 8C

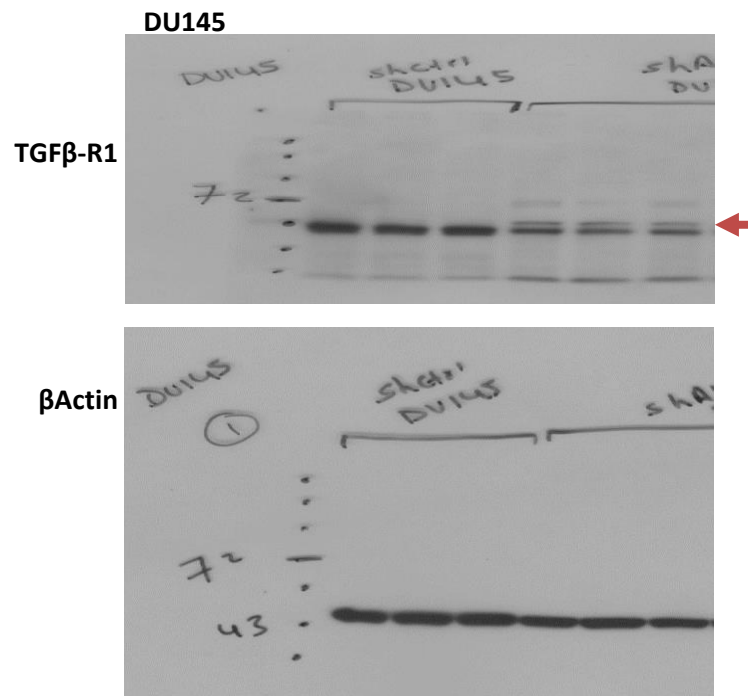

Images from Figure 8E

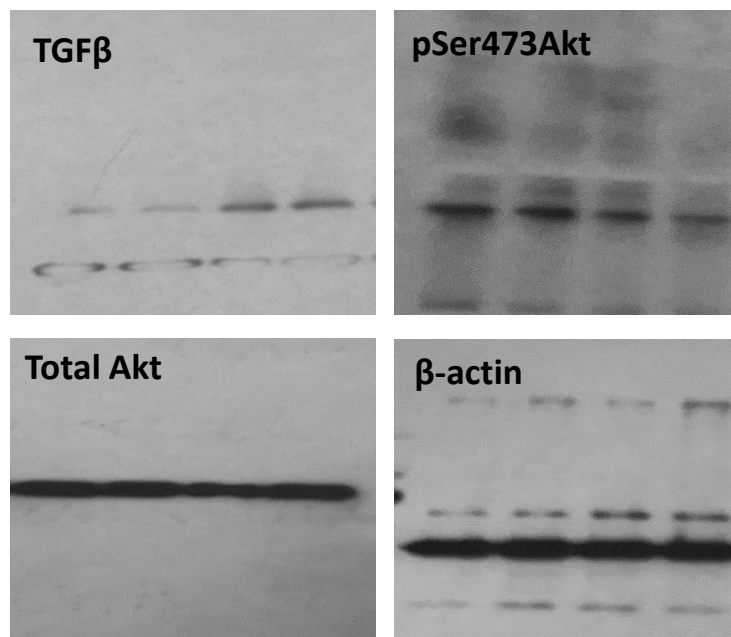

Supplemental Figure 4: Original Western blot images
